# Supplementary material for: Comprehensive analysis of immune escape-related prognostic signature in high-grade glioma
Source: Research Square preprint supplement (doi:10.21203/rs.3.rs-6330200/v1), 2025-05-13
Supplement: Supplementary file 1 [file 2744481e528cda7bee1fa3f1.xlsx]

## Sheet: Sheet1
Top 5 model genes ranked by MCC method
Rank	Name	Score
1	TNFRSF1A	61
2	TNFAIP3	54
3	TAB1	48
3	TRAF2	48
5	TNFRSF1B	36
