# Supplementary material for: Comprehensive analysis of immune escape-related prognostic signature in high-grade glioma
Source: Research Square preprint supplement (doi:10.21203/rs.3.rs-6330200/v1), 2025-05-13
Supplement: Supplementary file 2 [file 647a060efe8b6d304c46c1cd.xlsx]

## Sheet: Sheet1
Energy (kcal/mol)
model_gene	Temozolomide
ERP44	-6.2
IFNGR2	-5.7
KMT2A	-6.3
TAB1	-6.3
TNFRSF1A	-7.3
TRAF2	-6.2
UBE2N	-6.5
