# Supplementary material for: Comprehensive analysis of immune escape-related prognostic signature in high-grade glioma
Source: Research Square preprint supplement (doi:10.21203/rs.3.rs-6330200/v1), 2025-05-13
Supplement: Supplementary file 3 [file 6d24d0e66a4d380c760ab3f2.docx]

Figure S1. A flowchart describing the research process.

Figure S2. Marker genes in each cluster.

Supplementary Table S1. 182 genes related to the immune escape.

Supplementary Table S2. Results of drug sensitivity analysis.

Supplementary Table S3. Binding energy of temozolomide with model proteins.

Supplementary Table S4. Top 5 model genes ranked by MCC method.
