# Supplementary material for: Comprehensive analysis of immune escape-related prognostic signature in high-grade glioma
Source: Research Square preprint supplement (doi:10.21203/rs.3.rs-6330200/v1), 2025-05-13
Supplement: Supplementary file 4 [file cc23140c9f7281bf5c840bda.xlsx]

## Sheet: Sheet1
Gene
ACAD9
ACTB
ADAR
AGO2
AHSA1
A/PC15
ARF6
ATG10
ATG101
ATG12
ATG14
ATG3
ATG5
ATG7
ATG9A
ATP13A1
ATXN7L3
B2M
BC003331
BCL2L1
BECN1
BOLA3
BRAT1
BRPF1
CAD
CALR
CEP55
CFLAR
CHIC2
CHMP5
COX6C
CREBBP
CUL3
DCP1A
DET1
DICER1
D/JC13
DNTTIP1
DOT1L
DPH5
EIF3H
EMC2
EMC3
EMC4
EMC6
EMC8
ERAP1
ERP44
F8A
FADD
FAM58B
FAS
FITM2
FNTB
GALE
GLS
GPAA1
GPI1
H2-K1
HCFC2
HDAC1
HDGFRP2
HEXIM1
HIRA
HSPA13
IF/R1
IF/R2
IFNGR1
IFNGR2
IKBKB
IKBKG
INO80
IPPK
IRF1
IRF9
IST1
JAGN1
JAK1
JAK2
JMJD6
KAT6A
KLF16
KMT2A
LIPT2
MAP3K7
MAPK1
MED16
MED23
MED24
MEN1
MGAT1
MOGS
MTA2
N6AMT1
NCBP1
NDUFA13
NDUFAF6
NPLOC4
NUP188
NXT1
OTUD5
OTULIN
PCBP2
PCED1B
PDCD6IP
PDIA3
PDSS2
PI4KB
PIGK
PIGS
PIGT
PIGU
PKN2
PPP1CA
PPP1R8
PPP2R2A
PPP2R3C
PRKCSH
PSMB8
PSMB9
PSMG1
PTAR1
PTPN2
RB1CC1
RBCK1
RBM15
RCE1
RGP1
RIC1
RIC8
RNF31
S100PBP
SARNP
SCAF4
SETD1A
SETDB1
SLC25A32
SMG7
SOCS1
SPCS1
SRRT
SRSF7
STAT1
STAT2
STOML2
SUSD6
TAB1
TAB2
TAP1
TAP2
TAPBP
TBK1
TFRC
TGFBR2
TMEM127
TMEM208
TNFAIP3
TNFRSF1A
TNFRSF1B
TRADD
TRAF2
TRPM7
UBE2G2
UBE2N
UBR5
UFC1
UFL1
USP7
UXS1
VDAC2
VPS13A
VPS16
VPS29
VPS35
VPS4B
WDR7
WDR83
WIPI2
WWP2
YAP1
ZC3H3
ZCCHC14
