# Supplementary material for: Comprehensive analysis of immune escape-related prognostic signature in high-grade glioma
Source: Research Square preprint supplement (doi:10.21203/rs.3.rs-6330200/v1), 2025-05-13
Supplement: Supplementary file 5 [file fd78562906aad2b902c9bf29.xlsx]

## Sheet: Sheet1
Drug	Mean_Sensitivity
Carmustine	8.80247
Nelarabine	8.68732
MIRA-1	7.81485
AZD1208	7.62384
Cyclophosphamide	7.43697
LY2109761	7.42627
IAP_5620	7.40517
CZC24832	7.30639
BIBR-1532	7.13967
LCL161	7.1216
GDC0810	7.09971
GSK2578215A	7.08324
OSI-027	6.8903
5-Fluorouracil	6.84723
AGI-5198	6.70981
Dabrafenib	6.64751
GSK591	6.60718
BPD-00008900	6.5526
Doramapimod	6.52262
PCI-34051	6.50262
Ibrutinib	6.49436
ML323	6.46576
P22077	6.44533
PLX-4720	6.44241
XAV939	6.35105
KU-55933	6.3044
I-BRD9	6.29987
Niraparib	6.22178
Olaparib	6.20772
Wnt-C59	6.10983
Selumetinib	6.06128
OF-1	5.9394
PD173074	5.87164
PF-4708671	5.65106
MIM1	5.64096
AZD1332	5.60043
TAF1_5496	5.56886
Linsitinib	5.46539
Zoledronate	5.45109
GSK2606414	5.41468
Entospletinib	5.41329
Palbociclib	5.33094
AT13148	5.309
Sinularin	5.1956
Tamoxifen	5.18843
WEHI-539	5.08134
Elephantin	5.06022
ERK_6604	5.00884
Pyridostatin	4.88429
BMS-345541	4.87786
VE-822	4.86909
I-BET-762	4.84192
PRT062607	4.73812
Gefitinib	4.71744
AZD6482	4.71065
Cisplatin	4.69226
Axitinib	4.48157
MK-2206	4.43644
Lapatinib	4.40675
Uprosertib	4.38895
Uprosertib	4.38895
ZM447439	4.31225
Fulvestrant	4.28391
Fulvestrant	4.28391
GSK269962A	4.27969
VX-11e	4.19137
NVP-ADW742	4.09356
RO-3306	4.02708
UMI-77	4.00605
ERK_2440	3.97137
Sorafenib	3.92124
SCH772984	3.87463
Savolitinib	3.8664
Irinotecan	3.83739
JQ1	3.81322
NU7441	3.80442
OTX015	3.70759
VSP34_8731	3.58528
PAK_5339	3.57657
BDP-00009066	3.54521
ULK1_4989	3.4844
AZD5582	3.42489
AZD5438	3.35955
Entinostat	3.30862
ABT737	3.24134
BMS-536924	3.23616
Taselisib	3.20408
AZD2014	3.18439
Wee1 Inhibitor	3.07502
Navitoclax	2.93872
Afatinib	2.83626
Osimertinib	2.73086
Dasatinib	2.70795
IGF1R_3801	2.69688
Vorinostat	2.40745
Pictilisib	2.37993
Obatoclax Mesylate	2.32939
Foretinib	1.88462
Pevonedistat	1.63513
Trametinib	1.56796
Mitoxantrone	1.50733
PD0325901	1.47933
GNE-317	1.4551
BMS-754807	1.43848
Teniposide	1.43035
AZD7762	1.10711
Topotecan	1.08972
AZD8055	0.872158
Gemcitabine	0.788422
Vincristine	0.274111
MG-132	0.264824
Rapamycin	0.18496
Luminespib	0.162431
Camptothecin	0.141602
Dactinomycin	0.124733
Dactinomycin	0.124733
Dinaciclib	0.0954517
Staurosporine	0.0755308
Daporinad	0.0253371
Sepantronium bromide	0.0245157
Bortezomib	0.0113303
